# Supplementary material for: Parabiosis and single-cell RNA sequencing reveal a limited contribution of monocytes to myofibroblasts in kidney fibrosis
Source: JCI journal article supplement (doi:10.1172/jci.insight.99561), 2018-05-02
Supplement: sd1 [file 1]

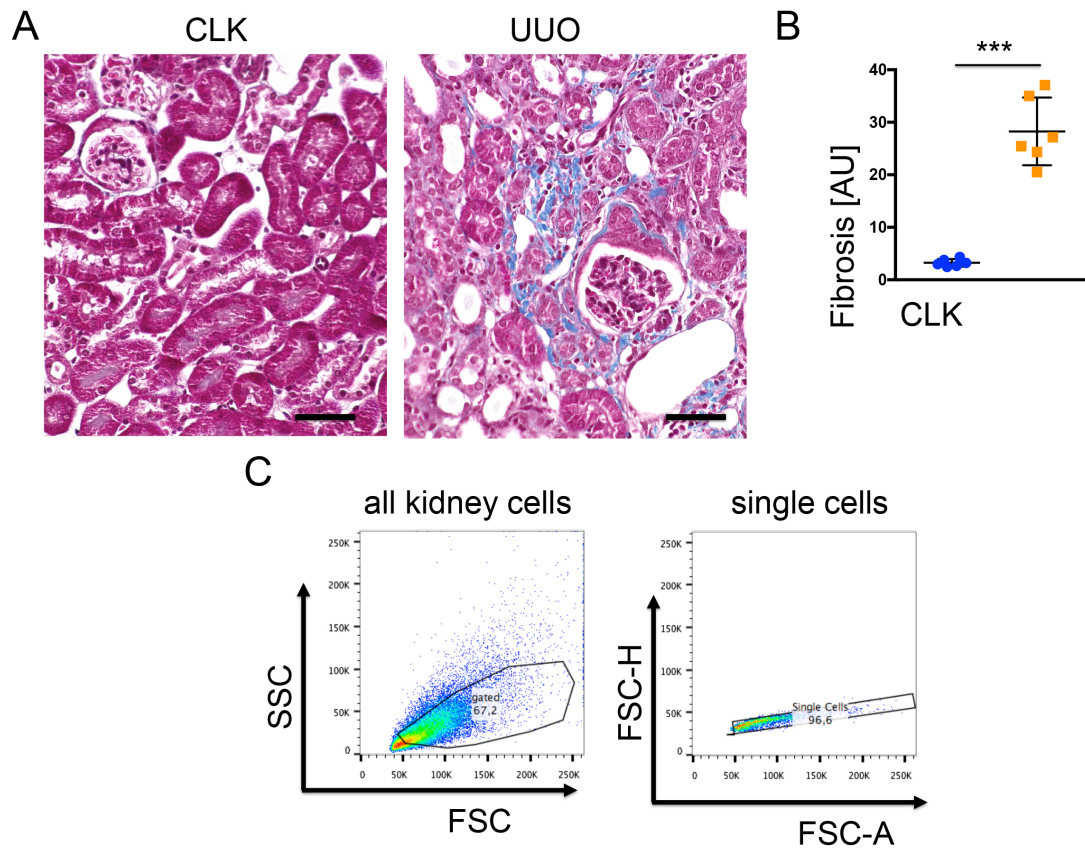

**Supplementary Figure S1 Trichrome staining and representative gating for flow cytometry of whole kidneys**

(A-B) Non-injured contralateral (CLK) kidneys and injured unilateral ureteral obstructed (UUO) kidney of the CD45.1 parabiont were trichrome stained and the interstitial fibrosis was quantified. Scale bars 50µm. \*\*\*p<0.001 by unpaired t-test.

(C) Representative gating for flow-cytometric analysis of the whole kidneys.

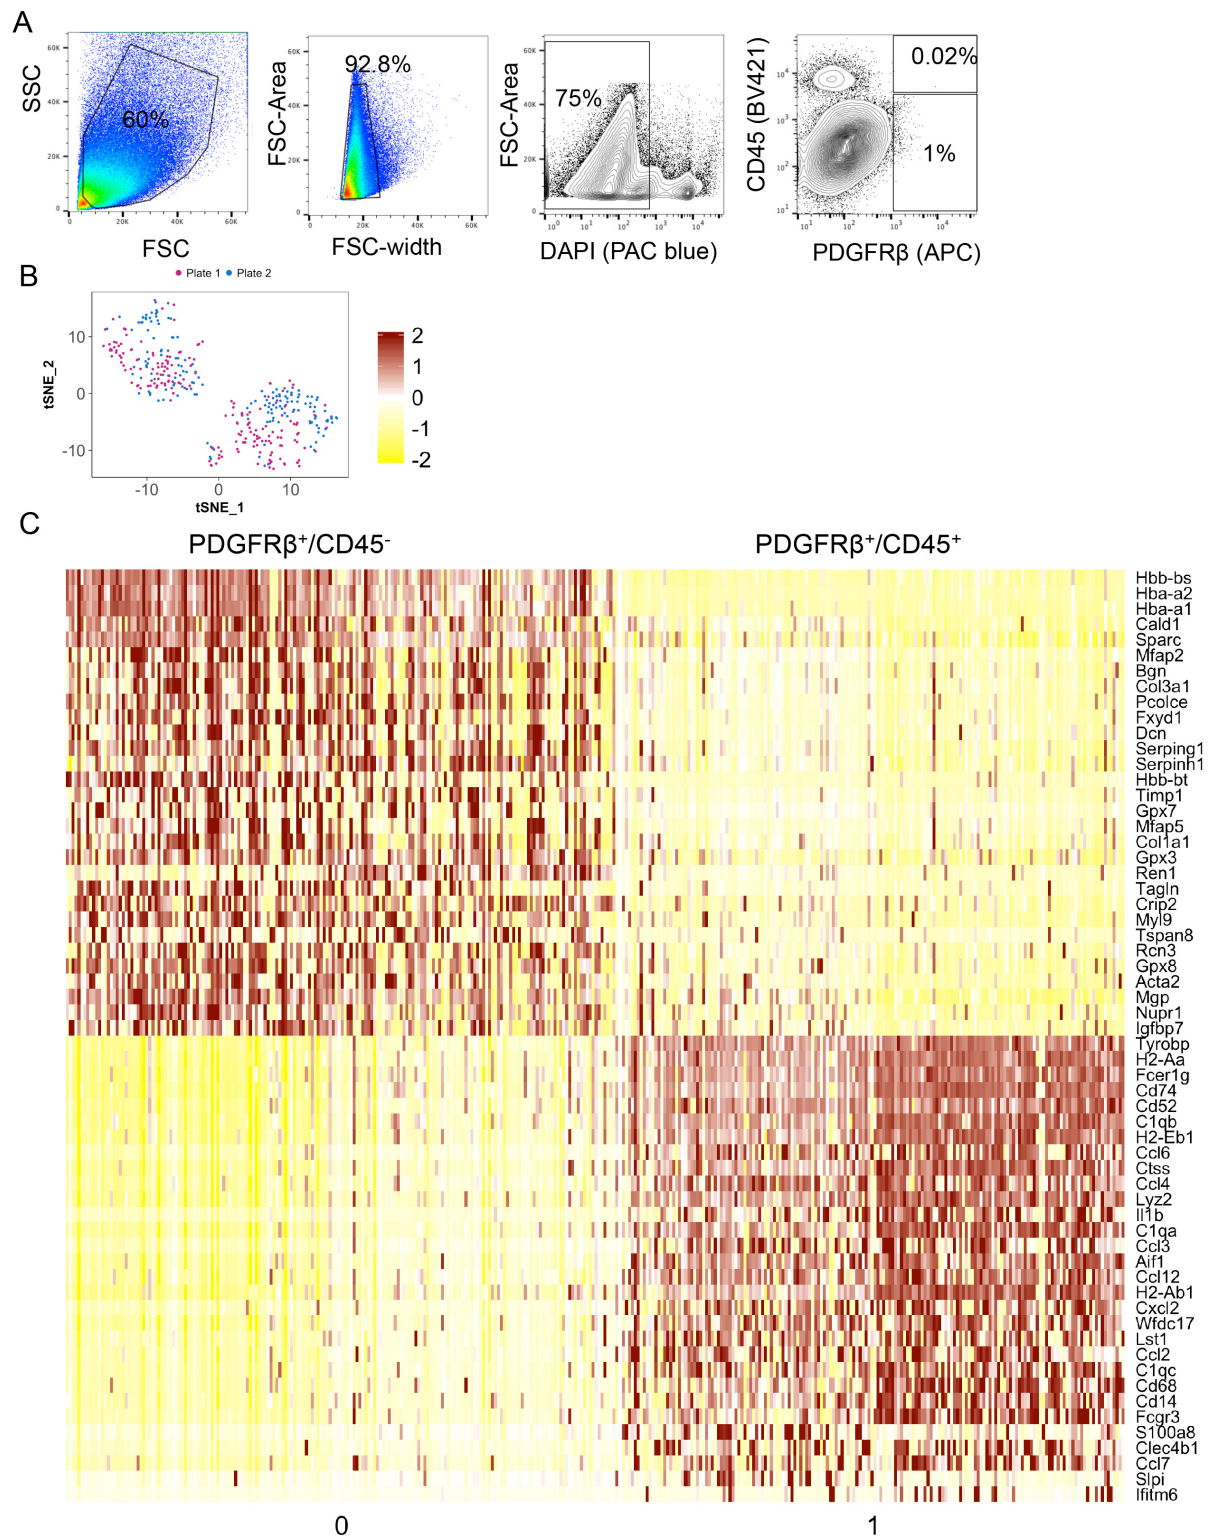

**Supplementary Figure S2 Representative gating for FACS and top upregulated genes in single cell RNA-Sequencing clusters of resident and circulating myofibroblasts**  
 (A) Representative gating for the sorting (FACS) of whole kidneys on single/living (DAPI-) PDGFR $\beta$ + /CD45+ and PDGFR $\beta$ - /CD45- cells  
 (B) tSNE analysis clusters with respect to the batch.  
 (C) Top 30 expressed genes in the two tSNE clusters.

A

Top 5 GO terms for each category

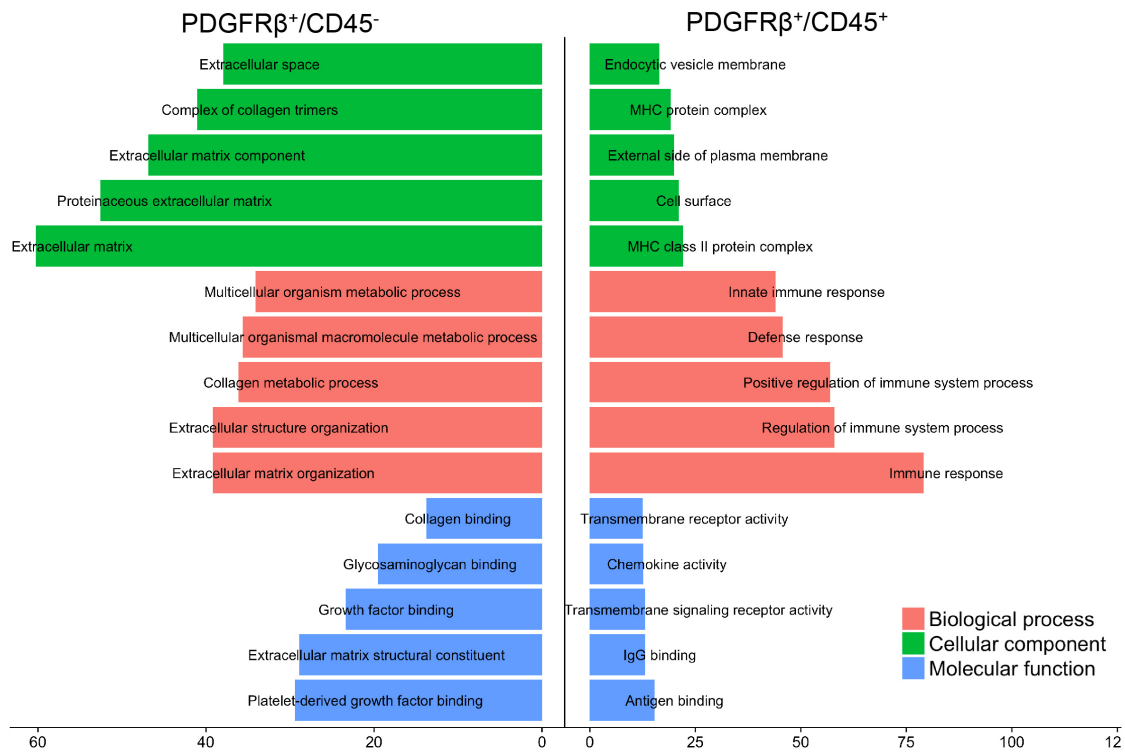

B

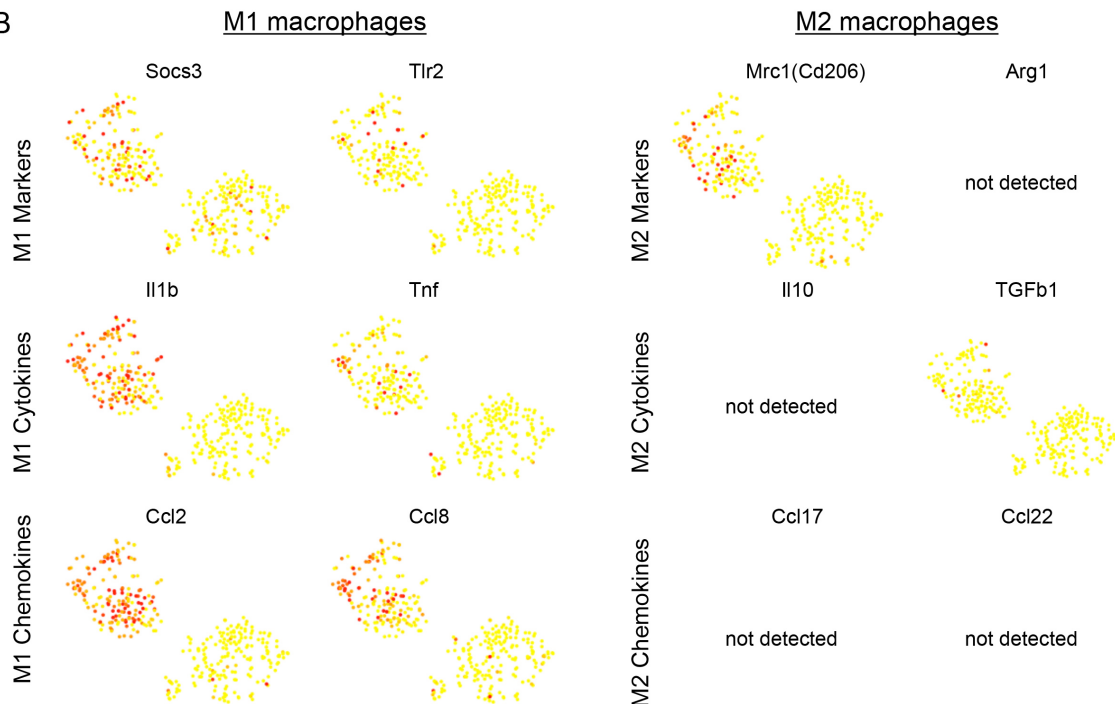

**Supplementary Figure S3 Top gene ontology terms and macrophage polarization markers in the two clusters.**

(A) Top 5 gene ontology (GO) terms of the two tSNE cluster for the categories biological process, cellular component and molecular function.

(B) Expression levels of genes that define M1 and M2 macrophages in both tSNE clusters. (Socs3, suppressor of cytokine signaling 3; Tlr2, toll-like receptor 2; Il1b, Interleukin 1b; Tnf, tumor necrosis factor alpha; Ccl2, cc-chemokine ligand 2; Ccl8, cc-chemokine ligand 8; Mrc1, mannose receptor 1; Arg1, arginase 1; Il10, Interleukin 10; TGFb1, transforming

growth factor beta 1; Ccl17, cc-chemokine ligand 17; Ccl22, cc-chemokine ligand 22 Color key denotes the z-score normalized average expression value of selected differentially expressed genes between PDGFR $\beta^+$ /CD45 $^-$  and PDGFR $\beta^+$ /CD45 $^+$  cells.

**Supplementary Table 1: Transcription factors for PDGFRb+/CD45+ cell population in kidney fibrosis**

| <b>TF</b> | <b>DC</b> | <b>CC</b> | <b>BC</b> | <b>DFC</b> | <b>DCC</b> | <b>DDC</b> | <b>AVG.RANK</b> |
|-----------|-----------|-----------|-----------|------------|------------|------------|-----------------|
| Fos       | 1         | 2         | 1         | 1          | 1          | 1          | 1               |
| Atf3      | 2         | 1         | 2         | 3          | 3          | 2          | 2               |
| Junb      | 4         | 3         | 3         | 2          | 2          | 3          | 3               |
| Egr1      | 6         | 6         | 5         | 4          | 4          | 4          | 4               |
| Maf       | 3         | 4         | 4         | 6          | 7          | 5          | 4               |
| Batf3     | 7         | 5         | 6         | 8          | 9          | 9          | 6               |
| Pou2f2    | 9         | 7         | 9         | 6          | 7          | 8          | 7               |
| Batf      | 11        | 12        | 8         | 5          | 5          | 6          | 8               |
| Spi1      | 8         | 8         | 7         | 11         | 6          | 7          | 8               |
| Jun       | 5         | 12        | 11        | 11         | 12         | 12         | 10              |
| Sub1      | 11        | 16        | 10        | 8          | 9          | 11         | 11              |
| Irf8      | 14        | 14        | 12        | 8          | 9          | 10         | 12              |
| Ddit3     | 11        | 9         | 14        | 11         | 12         | 13         | 13              |
| Stat1     | 14        | 10        | 13        | 11         | 12         | 14         | 14              |
| Klf6      | 9         | 15        | 15        | 11         | 12         | 15         | 15              |
| Nfe2l2    | 17        | 17        | 17        | 11         | 12         | 17         | 16              |
| Mafb      | 16        | 11        | 16        | 17         | 17         | 16         | 17              |

**TF**: transcription factor; **DC**: Degree Centrality; **CC**: Closeness Centrality; **BC**: Betweenness Centrality; **DFC**: Disruptive Fragmentation Centrality; **DCC**: Disruptive Connection Centrality; **DDC**: Disruptive Distance Centrality; **AVG.RANK**: Average Ranking.

**Supplementary Table 2: Transcription factors for the PDGFRb+/CD45- cell population in kidney fibrosis**

| TF      | DC | CC | BC | DFC | DCC | DDC | AVG.RANK |
|---------|----|----|----|-----|-----|-----|----------|
| Id3     | 2  | 1  | 1  | 4   | 4   | 2   | 1        |
| Prrx1   | 4  | 5  | 2  | 1   | 1   | 1   | 1        |
| Nr2f2   | 3  | 2  | 3  | 4   | 4   | 4   | 3        |
| Tcf21   | 1  | 3  | 5  | 4   | 4   | 6   | 4        |
| Tsc22d1 | 10 | 6  | 4  | 2   | 2   | 3   | 5        |
| Heyl    | 5  | 4  | 6  | 4   | 4   | 5   | 6        |
| Peg3    | 8  | 11 | 7  | 2   | 2   | 7   | 7        |
| Nfic    | 7  | 8  | 8  | 4   | 4   | 8   | 8        |
| Zbtb20  | 8  | 12 | 9  | 4   | 4   | 10  | 9        |
| Hoxd10  | 6  | 13 | 11 | 4   | 4   | 12  | 10       |
| Hoxa10  | 14 | 17 | 10 | 4   | 4   | 9   | 11       |
| Snai2   | 12 | 15 | 15 | 4   | 4   | 15  | 12       |
| Nr1d1   | 11 | 19 | 13 | 4   | 4   | 16  | 13       |
| Ssrp1   | 12 | 14 | 16 | 4   | 4   | 17  | 13       |
| Tcf4    | 19 | 16 | 14 | 4   | 4   | 11  | 15       |
| Nfib    | 17 | 18 | 12 | 4   | 4   | 13  | 15       |
| Hoxc10  | 17 | 7  | 21 | 4   | 4   | 18  | 17       |
| Creb3l2 | 21 | 9  | 20 | 4   | 4   | 14  | 18       |
| Alx1    | 21 | 10 | 22 | 4   | 4   | 19  | 19       |
| Snai1   | 15 | 20 | 19 | 4   | 4   | 21  | 20       |
| Zfp948  | 19 | 21 | 18 | 4   | 4   | 22  | 21       |
| Meis2   | 24 | 23 | 17 | 4   | 4   | 20  | 22       |
| Klf9    | 15 | 22 | 24 | 4   | 4   | 23  | 22       |
| Glis2   | 21 | 25 | 23 | 4   | 4   | 24  | 24       |
| Tead1   | 24 | 24 | 27 | 4   | 4   | 25  | 25       |
| Thap7   | 26 | 27 | 26 | 4   | 4   | 26  | 26       |
| Nfix    | 27 | 26 | 25 | 4   | 4   | 27  | 26       |
| Cers2   | 27 | 28 | 28 | 4   | 4   | 28  | 28       |
| Ebf1    | 29 | 29 | 29 | 4   | 4   | 29  | 29       |
| Trp53   | 30 | 30 | 30 | 4   | 4   | 30  | 30       |

**TF:** transcription factor; **DC:** Degree Centrality; **CC:** Closeness Centrality; **BC:** Betweenness Centrality; **DFC:** Disruptive Fragmentation Centrality; **DCC:** Disruptive Connection Centrality; **DDC:** Disruptive Distance Centrality; **AVG.RANK:** Average Ranking.
